# Supplementary material for: Transmission dynamics and control of multidrug-resistant Klebsiella pneumoniae in neonates in a developing country
Source: eLife journal article supplement (doi:10.7554/elife.50468), 2019-12-03
Supplement: supp [file elife-50468-supp-v1.zip]

Archive with 5 entries (5 files):
- elife_poa_e50468_Figure_2_figure_supplement_1.pdf
- elife_poa_e50468_Transparent_Reporting_File.pdf
- elife_poa_e50468_Figure_3_figure_supplement_1.pdf
- elife_poa_e50468_Figure_3_figure_supplement_2.pdf
- elife_poa_e50468_Figure_2_figure_supplement_2.pdf
