# Supplementary figures and images for: Transmission dynamics and control of multidrug-resistant Klebsiella pneumoniae in neonates in a developing country
Source: eLife journal article supplement (doi:10.7554/elife.50468), 2019-12-03

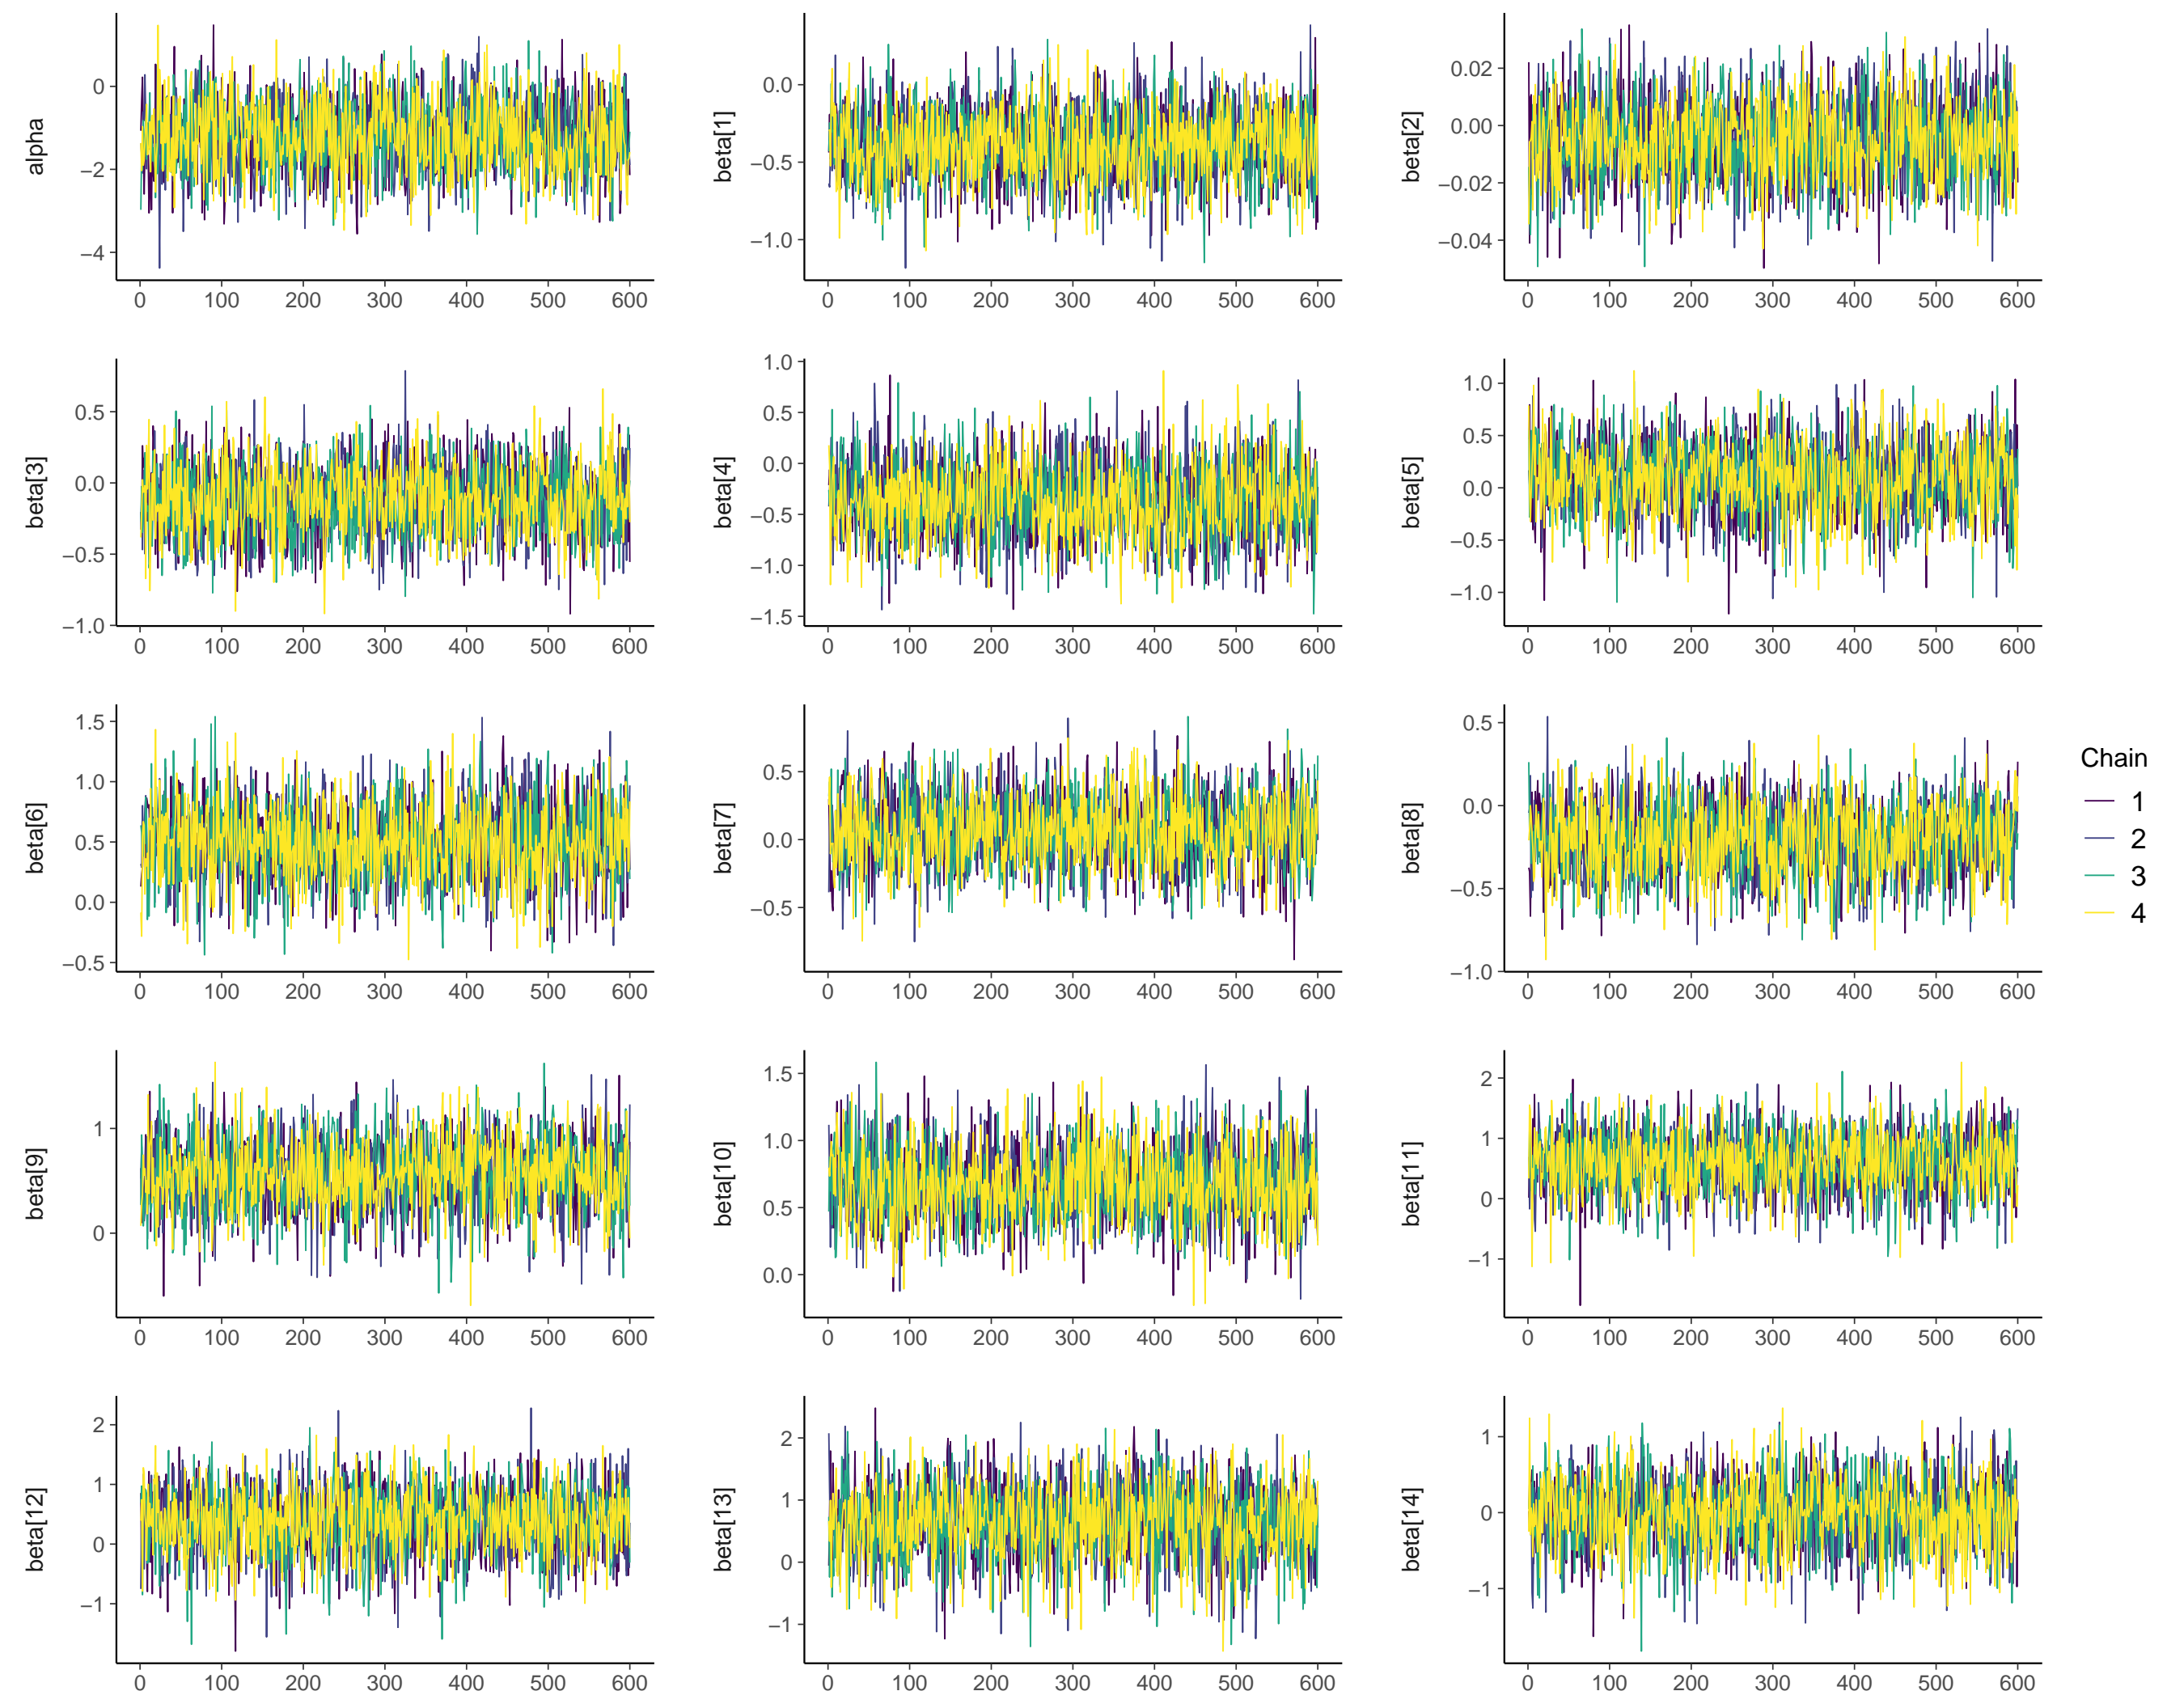

Supplement: supp [file elife-50468-supp-v1.zip › elife_poa_e50468_Figure_2_figure_supplement_1.pdf]

**(A)**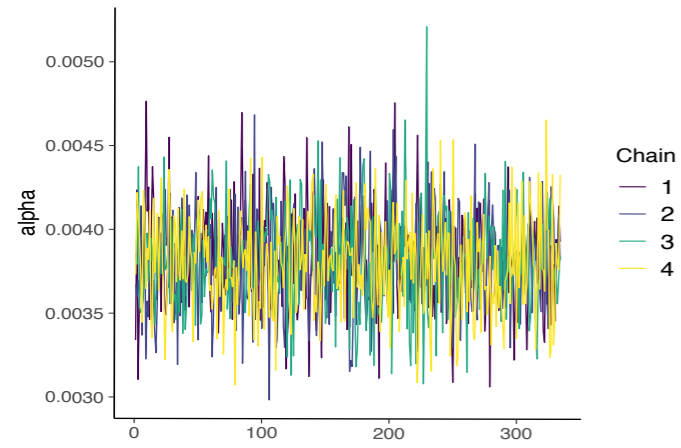**(B)**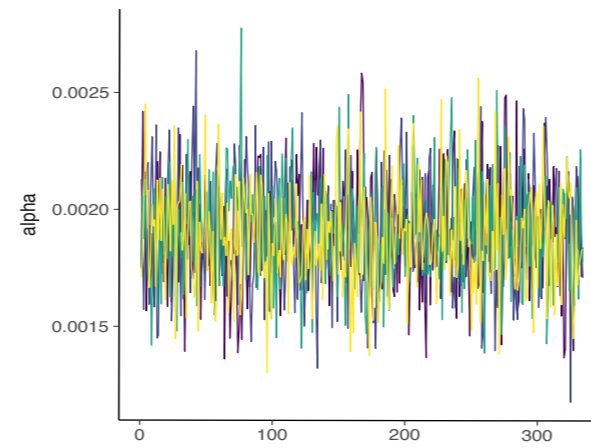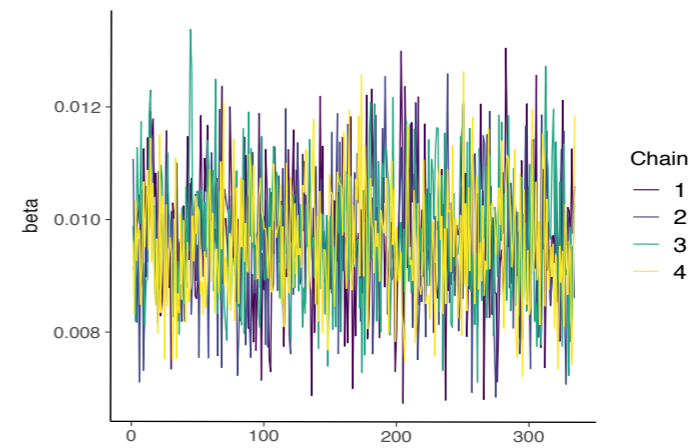**(C)**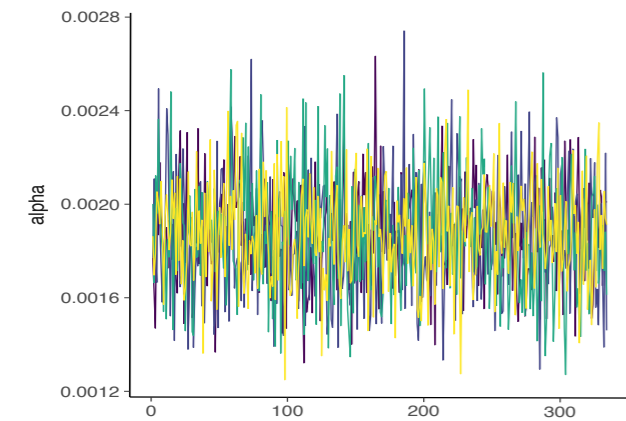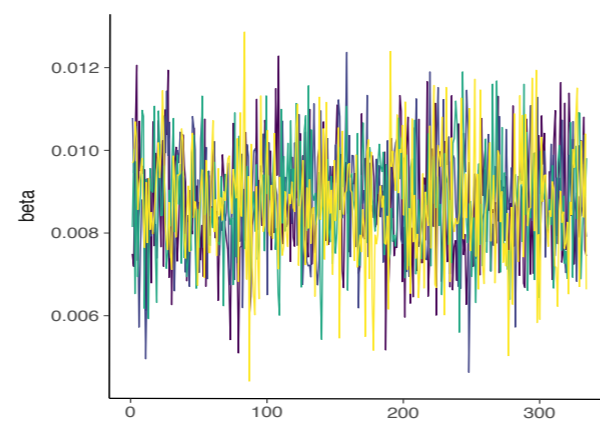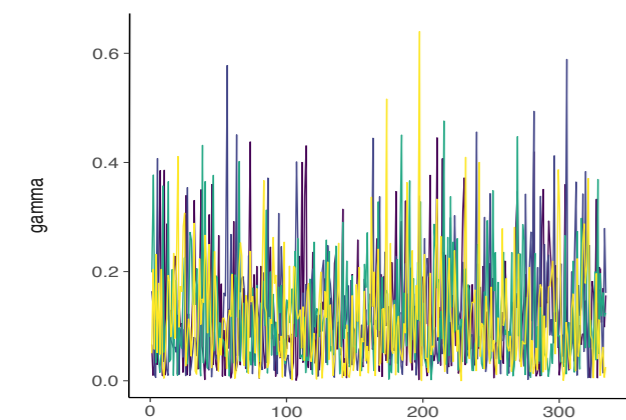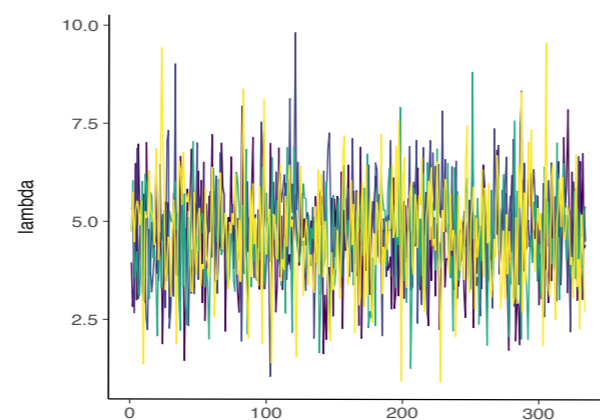**(D)**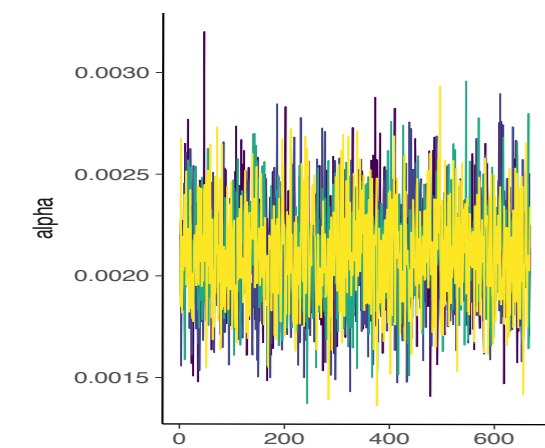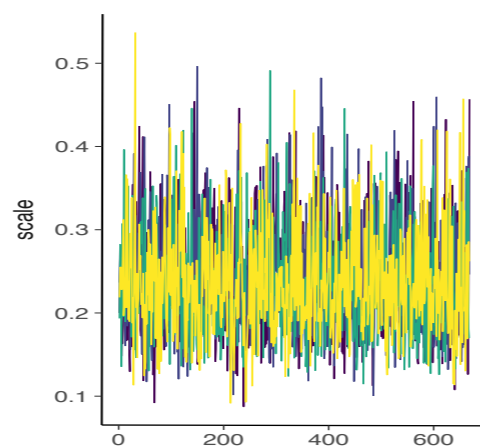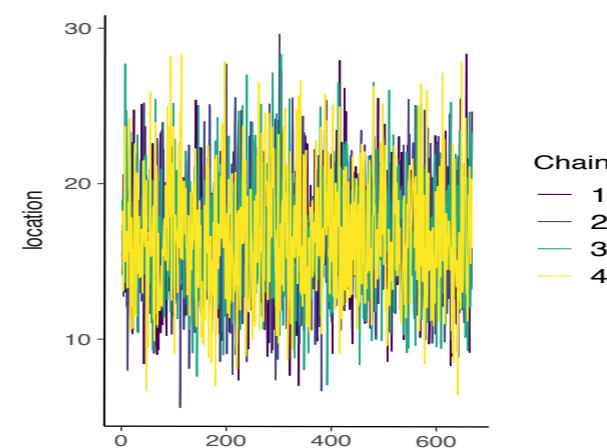

Supplement: supp [file elife-50468-supp-v1.zip › elife_poa_e50468_Figure_3_figure_supplement_1.pdf]

**(A)**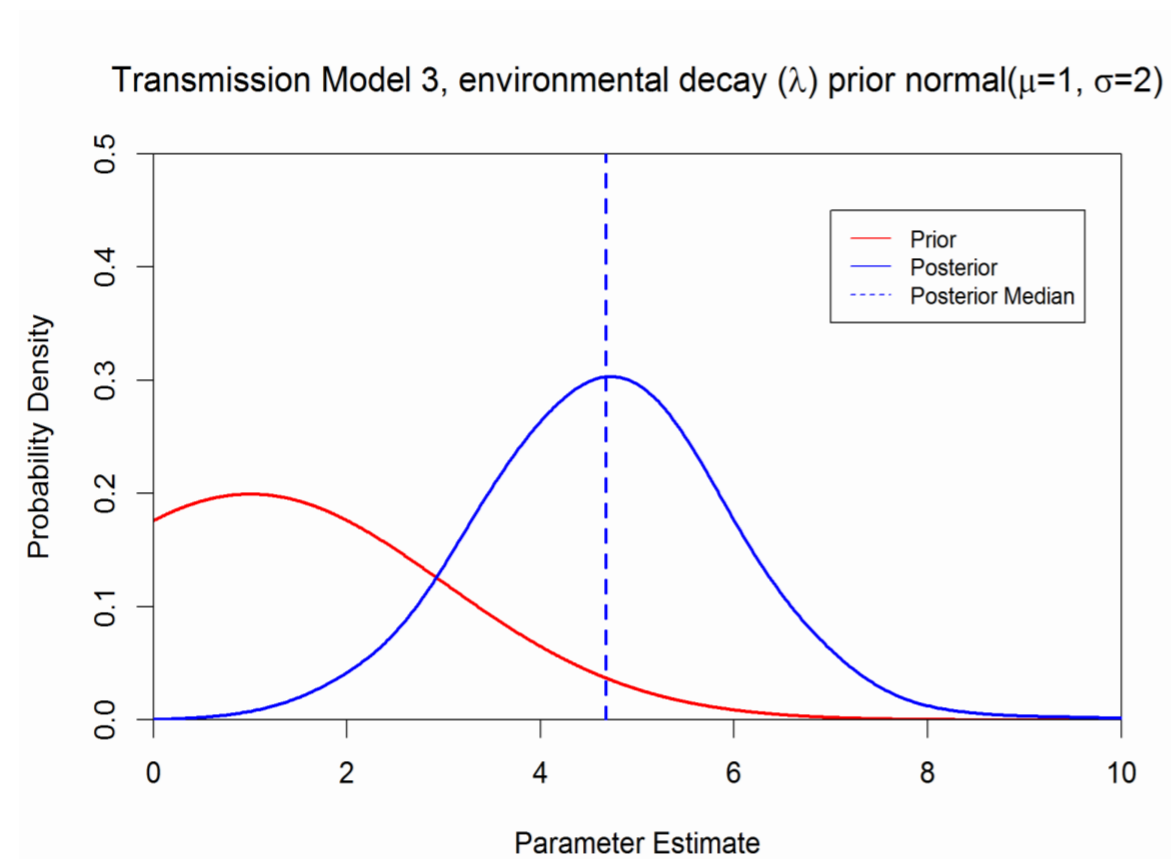**(B)**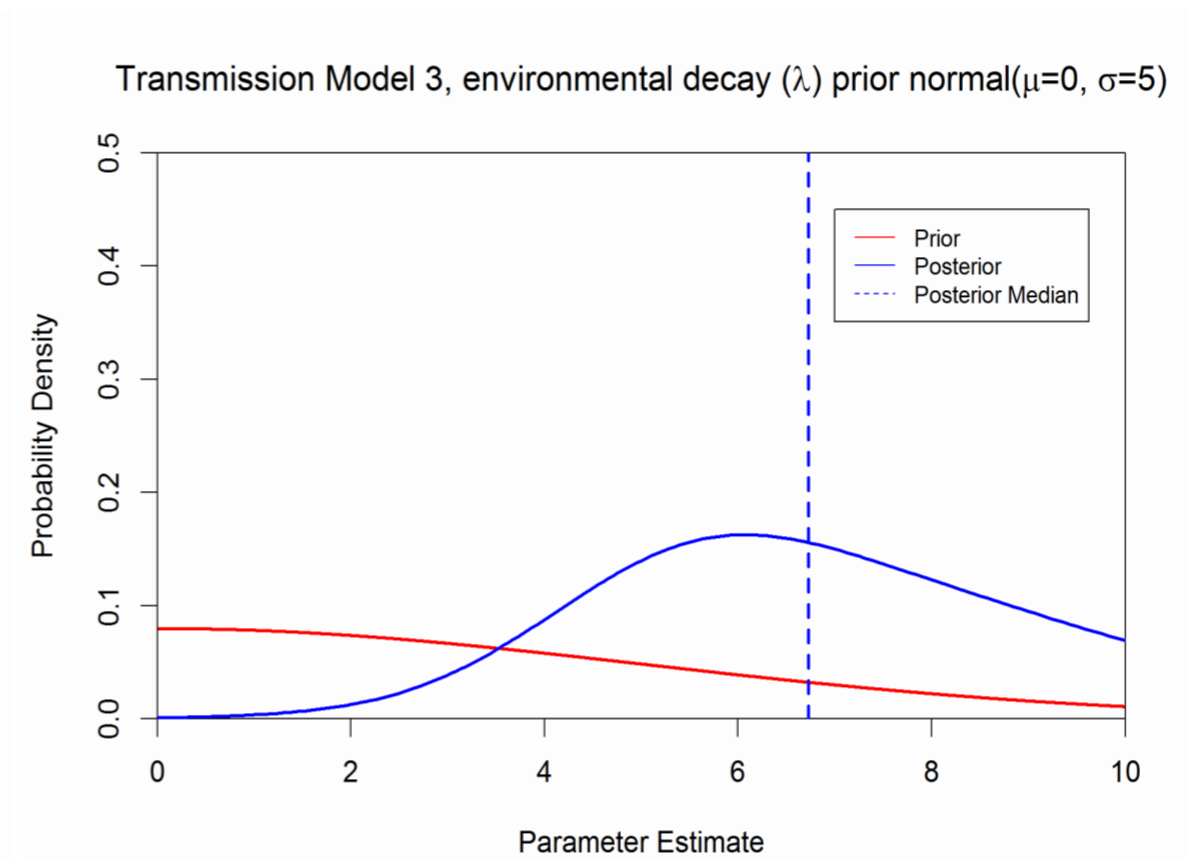**(C)**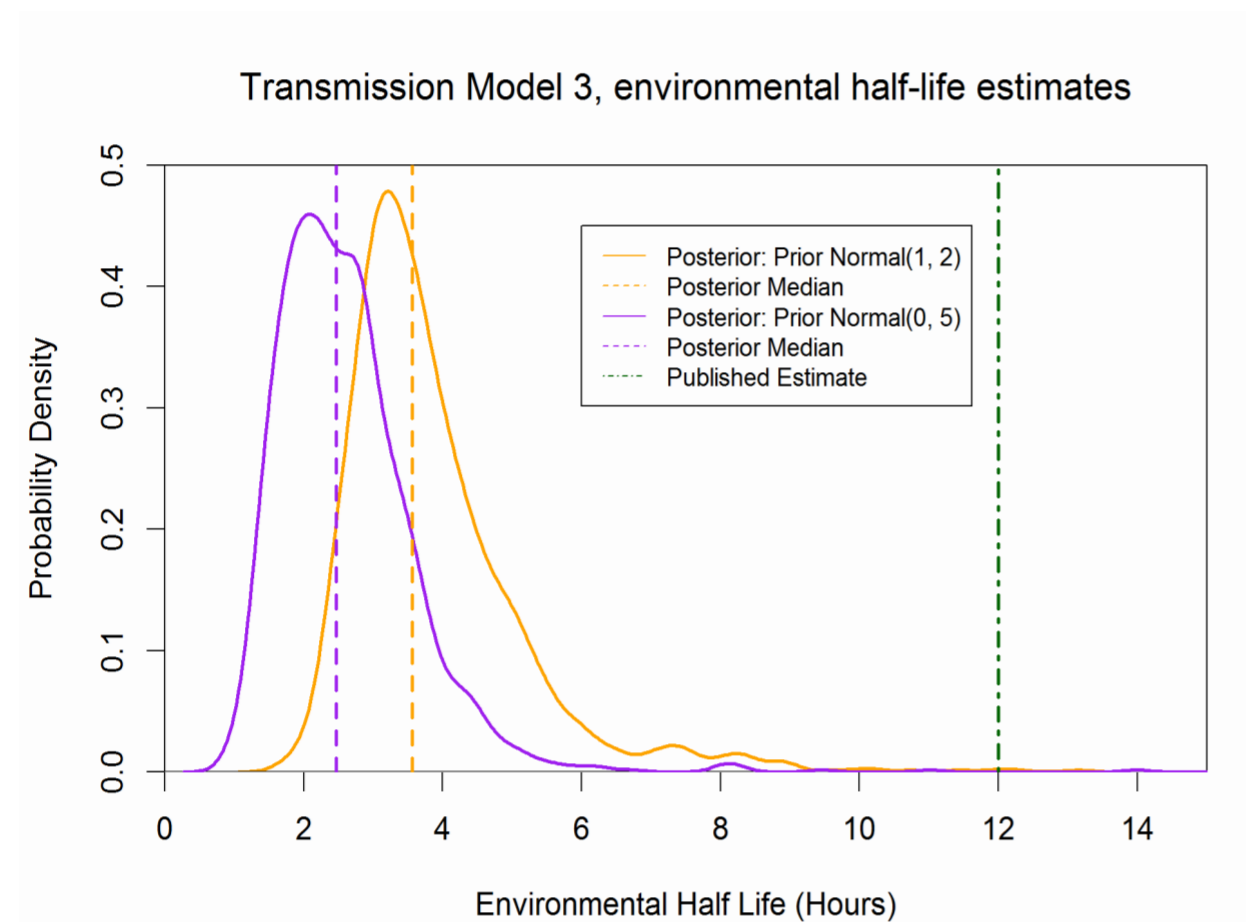

Supplement: supp [file elife-50468-supp-v1.zip › elife_poa_e50468_Figure_3_figure_supplement_2.pdf]

**(A)**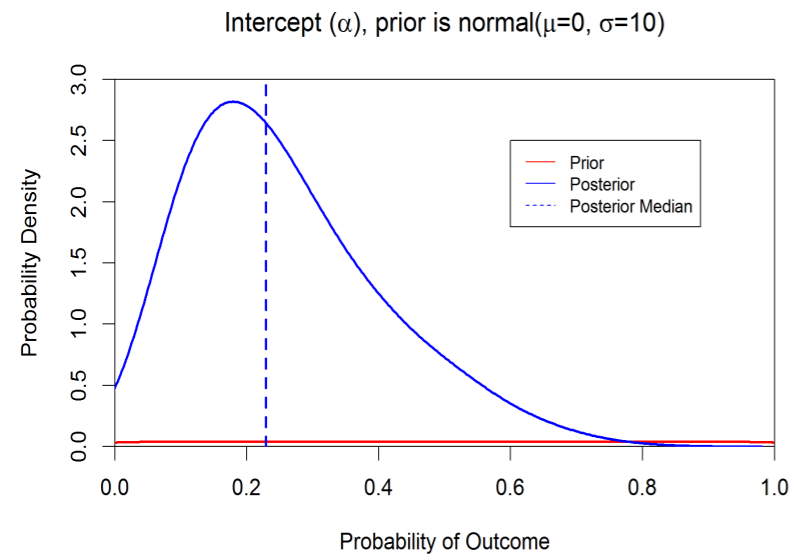**(B)**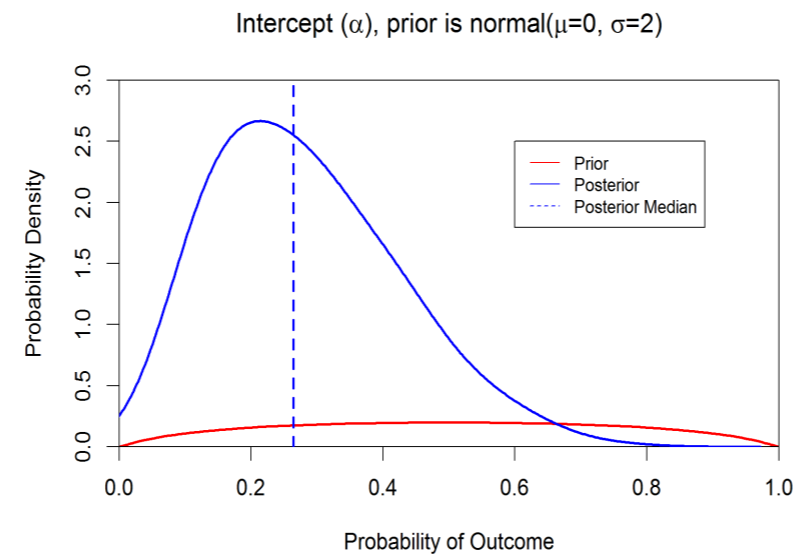**(C)**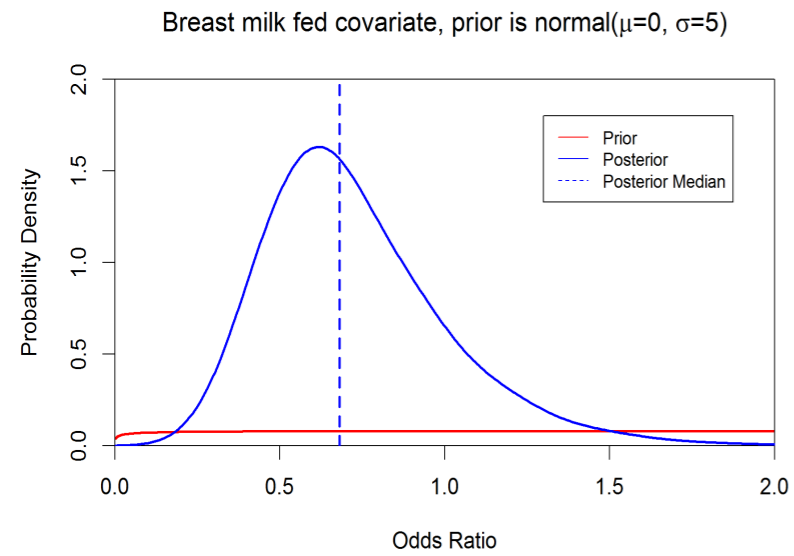**(D)**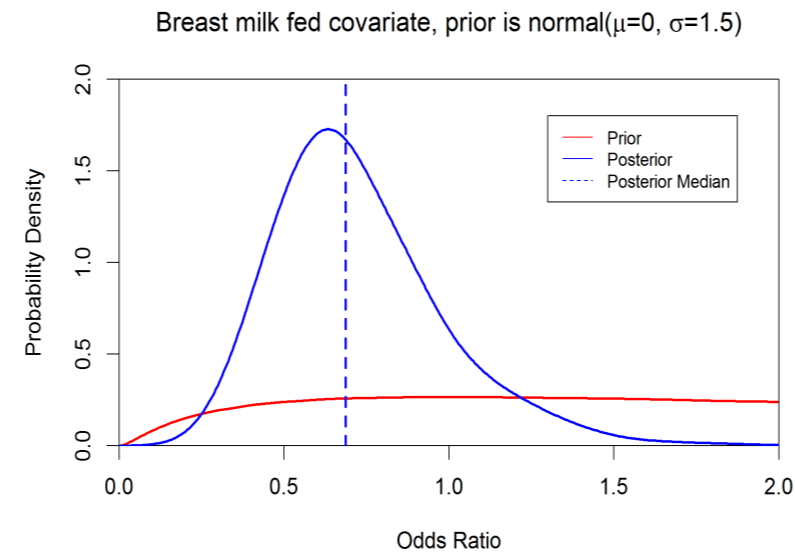**(E)**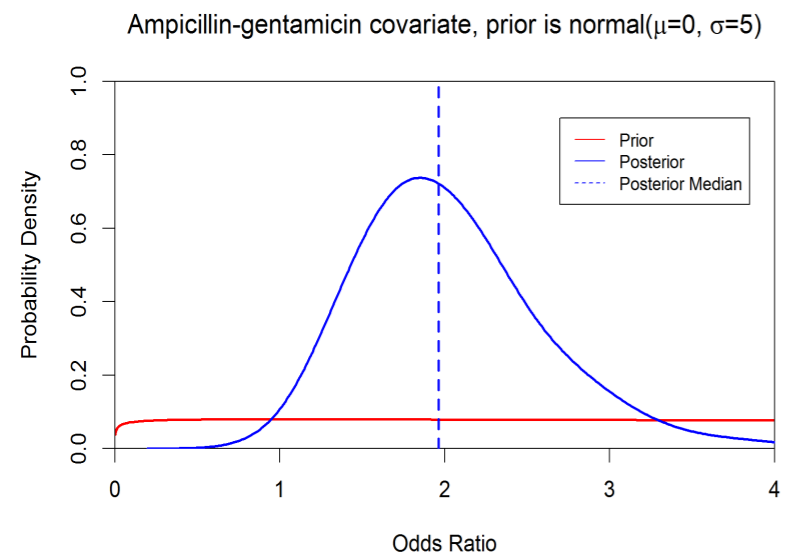**(F)**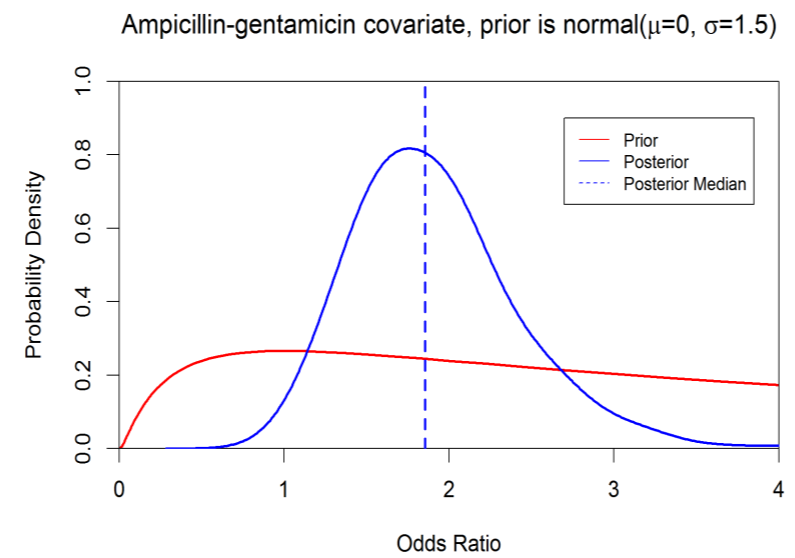

Supplement: supp [file elife-50468-supp-v1.zip › elife_poa_e50468_Figure_2_figure_supplement_2.pdf]
